# Supplementary material for: Miniaturized 3D bone marrow tissue model to assess response to Thrombopoietin-receptor agonists in patients
Source: eLife. 2021 Jun 1;10:e58775. doi: 10.7554/eLife.58775 (PMC8169123; doi:10.7554/eLife.58775)
Supplement: Figure 2—source data 1. [file elife-58775-fig2-data1.xlsx]

## Sheet: Figure 2F
		Pore diameter (μm)
		Top	Bottom
		70	50
		70	90
		75	100
		110	100
		120	120
		140	130
		140	140
		140	140
		140	150
		150	160
		160	180
		160	190
		160	190
		160	190
		160	190
		180	190
		210	190
		210	190
		210	190
		210	190
		215	190
		215	190
		220	190
		230	200
		240	200
		240	200
		240	200
		250	200
		250	220
		250	230
		260	240
		260	240
		260	240
		260	240
		260	240
		260	240
		260	240
		260	240
		260	240
		260	240
		260	240
		260	240
		260	240
		260	240
		260	240
		260	240
		270	245
		270	250
		270	250
		270	250
		270	250
		270	250
		270	260
		277	260
		280	260
		280	270
		280	270
		280	270
		280	270
		280	270
		280	270
		280	270
		281	280
		285	280
		290	280
		290	280
		290	280
		290	280
		290	280
		290	280
		290	280
		290	280
		290	280
		300	280
		300	280
		300	285
		300	290
		300	290
		300	290
		300	290
		305	290
		310	290
		310	290
		310	290
		310	290
		310	290
		310	290
		310	290
		310	290
		310	290
		310	290
		320	290
		320	290
		320	290
		320	300
		330	300
		330	310
		360	310
		360	310
		360	310
		360	310
		360	320
		360	320
		360	330
		360	330
		360	340
		360	340
		360	340
		360	340
		380	340
		380	340
		380	340
		380	350
		390	350
		390	350
		390	350
		400	360
		400	360
		400	360
		400	370
		410	370
		415	370
		420	370
		420	370
		430	380
		430	380
		450	380
		450	380
		450	390
		460	390
		460	390
		460	390
		460	410
		460	410
		460	420
		460	420
		460	440
		480	440
		500	440
		500	450
		500	470
		510	470
		510	490
		520	500
		530	540
		540	540
		560	540
		560	550
		560	550
		600	550
		640	570
	mean	319.126	295.894
	SD	110.339	98.9951
