# Supplementary material for: Miniaturized 3D bone marrow tissue model to assess response to Thrombopoietin-receptor agonists in patients
Source: eLife. 2021 Jun 1;10:e58775. doi: 10.7554/eLife.58775 (PMC8169123; doi:10.7554/eLife.58775)
Supplement: Figure 3—figure supplement 1—source data 1. [file elife-58775-fig3-figsupp1-data1.xlsx]

## Sheet: A
		TPO	TPO+EPAG
	Output relative to TPO	1	1
		1	1.5
		1	1.7
		1	1.8
		1	2
		1	2
	mean	1	1.66667
	SD		0.377712

## Sheet: B
		TPO	TPO+EPAG
	% of proplatelet formation	7	14
		7	14
		9	13.5
		10	14
		12	18
		14	23.8
	mean	9.83333	16.2167
	SD	2.78687	4.0696
