# Supplementary material for: Miniaturized 3D bone marrow tissue model to assess response to Thrombopoietin-receptor agonists in patients
Source: eLife. 2021 Jun 1;10:e58775. doi: 10.7554/eLife.58775 (PMC8169123; doi:10.7554/eLife.58775)
Supplement: Figure 3—source data 1. [file elife-58775-fig3-data1.xlsx]

## Sheet: Figure 3B
		Healthy Ctrl	ANKRD26-RT	MYH9-RD
	Megakaryocyte output relative to Healthy Ctrl	1	0.264925	0.597015
		1	0.597015	0.597015
		1	0.746269	0.671642
		1	0.78	0.671642
		1	0.81	0.716418
		1	0.82	0.723881
		1	0.935821	0.834328
		1	1.01418	0.970149
		1	1.19	0.970149
		1	1.217	0.992537
		1	1.3	1.00149
		1	1.33358	1.00896
	mean	1	0.917399	0.812935
	SD		0.31492	0.166935

## Sheet: Figure 3C
		Healthy Ctrl	ANKRD26-RT	MYH9-RD
	Proplatelet formation relative to Healthy Ctrl	1	0.052356	0.0416667
		1	0.0588235	0.052356
		1	0.0833333	0.0588235
		1	0.120968	0.0666667
		1	0.15	0.0787402
		1	0.16	0.1
		1	0.181818	0.103093
		1	0.206186	0.114943
		1	0.297619	0.14
		1	0.344828	0.181818
		1	0.466667	0.208333
		1	0.708661	0.322581
	mean	1	0.235938	0.122418
	SD		0.193275	0.0812995

## Sheet: Figure 3D
		Healthy Ctrl	ANKRD26-RT	MYH9-RD
	N° of bifurcations	6	1	1
		7	1	1
		7	1	1
		8	1.5	1
		8	2	1
		9	2	1
		9	2	2
		10	2	2
		10	2	2
		10	2	3
		12	3	3
		12	3	3
	mean	9	1.875	1.75
	SD	1.90693	0.678401	0.866025
	Each value represents the mean n° of bifurcations of a minimum of 20 cells/sample.
