# Supplementary material for: Miniaturized 3D bone marrow tissue model to assess response to Thrombopoietin-receptor agonists in patients
Source: eLife. 2021 Jun 1;10:e58775. doi: 10.7554/eLife.58775 (PMC8169123; doi:10.7554/eLife.58775)
Supplement: Figure 4—source data 1. [file elife-58775-fig4-data1.xlsx]

## Sheet: Figure 4C
		Thrombopoietin				Thrombopoietin plus Eltrombopag
		2N	4N	8N	>16N	2N	4N	8N	>16N
	% of megakaryocytes	50.4	35.5	9.1	5	48	33.6	12.4	6
		60.2	32	5.8	2	58.9	27	8.4	5.7
		35.4	43.3	13.6	7.7	45.2	41.1	9.4	4.3
		47.8	34	12.8	5.4	51.4	31	13	4.6
		45.2	33.8	14.5	6.5	43	36.2	15.5	5.3
		47	37.9	10.1	5	50	32.6	9	8.4
	mean	47.6667	36.0833	10.9833	5.26667	49.4167	33.5833	11.2833	5.71667
	SD	8.01964	4.04842	3.27745	1.91172	5.57079	4.78181	2.79458	1.46344

## Sheet: Figure 4E
		ANKRD26-RT					ANKRD26-RT
		Thrombopoietin	Thrombopoietin plus Eltrombopag				Thrombopoietin	Thrombopoietin plus Eltrombopag
	MFI CD41	12	17			MFI CD42b	13.2	13.5
		13.7	14				13.6	14
		14	17				15.23	11.55
		15.9	16.8				16	16
		16	16				16.03	15.07
		18.1	22				16.7	17
		19.4	20				17.84	17.69
		20.3	23				19	19.5
		21	22				19	18.7
		22	12.03				21.5	21
		22.1	24.1				22	23.45
		26.6	23.67				23	21.33
	mean	18.425	18.9667			mean	17.7583	17.3992
	SD	4.26148	4.02522			SD	3.22234	3.56413
		MYH9-RD					MYH9-RD
		Thrombopoietin	Thrombopoietin plus Eltrombopag				Thrombopoietin	Thrombopoietin plus Eltrombopag
	MFI CD41	14.15	10.9			MFI CD42b	12.37	11.28
		14.58	15.47				12.4	14
		16.16	18.54				17.25	20.43
		16.2	18				17.45	15.73
		16.65	13.2				18	17.6
		19.3	17.3				18.2	18.7
		20	20.5				18.6	19.6
		21	20.4				19.1	18
		22	19.2				20.4	20
		24.3	26.63				20.7	22
		25	21.5				22.2	21.8
		25.2	22.6				26.76	32.17
	mean	19.545	18.6867			mean	18.6192	19.2758
	SD	4.01749	4.22451			SD	3.91221	5.14448

## Sheet: Figure 4F
			ANKRD26-RT					MYH9-RD
			Thrombopoietin (red line)	Thrombopoietin plus Eltrombopag				Thrombopoietin (red line)	Thrombopoietin plus Eltrombopag
		OUTPUT - Fold increase relative to TPO	1	0.8			OUTPUT - Fold increase relative to TPO	1	1
			1	1				1	1
			1	1.2				1	1.5
			1	1.3				1	1.6
			1	1.3				1	1.7
			1	1.4				1	2.1
			1	1.6				1	2.1
			1	1.6				1	2.1
			1	2				1	2.2
			1	2.6				1	2.7
			1	3.2				1	3
			1	4.8				1	4.7
		mean	1	1.9			mean	1	2.14167
		SD		1.13858			SD		1.00495
