# Supplementary material for: Miniaturized 3D bone marrow tissue model to assess response to Thrombopoietin-receptor agonists in patients
Source: eLife. 2021 Jun 1;10:e58775. doi: 10.7554/eLife.58775 (PMC8169123; doi:10.7554/eLife.58775)
Supplement: Figure 5—source data 1. [file elife-58775-fig5-data1.xlsx]

## Sheet: Figure 5B
		ANKRD26-RT					MYH9-RD
		Thrombopoietin	Thrombopoietin plus Eltrombopag				Thrombopoietin	Thrombopoietin plus Eltrombopag
	% proplatelet formation	1	8			% proplatelet formation	0.7	1
		1	5				1	4.5
		1	4				1	5.5
		1.5	3				1	1
		1.5	10				1	1.5
		2	7				1	1.7
		2	16				1	1.5
		2.4	4				1	2
		3	8				2	4.5
		5	4				2.1	6.5
		7	7				2.5	7.5
		9	16				4	16
	mean	3.03333	7.66667			mean	1.525	4.43333
	SD	2.60849	4.4176			SD	0.964954	4.29362
