# Supplementary material for: Miniaturized 3D bone marrow tissue model to assess response to Thrombopoietin-receptor agonists in patients
Source: eLife. 2021 Jun 1;10:e58775. doi: 10.7554/eLife.58775 (PMC8169123; doi:10.7554/eLife.58775)
Supplement: Figure 6—source data 1. [file elife-58775-fig6-data1.xlsx]

## Sheet: Figure 6D
		Plt count increase ex vivo (x10^4)	Plt count increase in vivo (x10^3/μL)
	ANKRD26-RT	0	11
		6	11
		7.5	7
		15	32
		29	32
		32	40
		37	64
		38	49
		50	49
	MYH9-RD	1	9
		3	5
		17	50
		29	123
		32	60
		48	60
		55	138
		105	231

## Sheet: Figure 6E
		Megakaryocyte Output	Plt count increase in vivo (x10^3/μL)
	ANKRD26-RT	0.8	11
		1.04	40
		1.2	32
		1.3	11
		1.6	49
		2	32
		2.6	7
		3.2	49
		4.8	64
	MYH9-RD	1	9
		1	5
		1.5	60
		1.6	138
		1.7	50
		2.2	60
		2.65	123
		4.65	231
