# Supplementary material for: Miniaturized 3D bone marrow tissue model to assess response to Thrombopoietin-receptor agonists in patients
Source: eLife. 2021 Jun 1;10:e58775. doi: 10.7554/eLife.58775 (PMC8169123; doi:10.7554/eLife.58775)
Supplement: Figure 7—figure supplement 1—source data 1. [file elife-58775-fig7-figsupp1-data1.xlsx]

## Sheet: Figure 7-figure supplement 1
		SOX2
		MEAN	SEM	N
	RC17	1	0	2
	CTR2#6	0.85	0.1	2
	Healthy control	0.6	0.05	2
	MYH9-RD (clone MH-1)	0.65	0.04	2
	MYH9-RD (clone MH-11)	0.42	0.08	2
		OCT4
		MEAN	SEM	N
	RC17	1	0	2
	CTR2#6	2.34	0.17	2
	Healthy control	1.99	0.17	2
	MYH9-RD (clone MH-1)	2.75	0.25	2
	MYH9-RD (clone MH-11)	1.89	0.1	2
		NANOG
		MEAN	SEM	N
	RC17	1	0	2
	CTR2#6	1.65	0.09	2
	Healthy control	1.81	0.1	2
	MYH9-RD (clone MH-1)	3.07	0.15	2
	MYH9-RD (clone MH-11)	1.76	0.08	2
