# Supplementary material for: Miniaturized 3D bone marrow tissue model to assess response to Thrombopoietin-receptor agonists in patients
Source: eLife. 2021 Jun 1;10:e58775. doi: 10.7554/eLife.58775 (PMC8169123; doi:10.7554/eLife.58775)
Supplement: Figure 7—source data 1. [file elife-58775-fig7-data1.xlsx]

## Sheet: Figure 7A
		CD42a					CD42b
		Healthy CTRL	MYH9-RD				Healthy CTRL	MYH9-RD
	MFI - fold increase relative to Healthy CTRL	100	80			MFI - fold increase relative to Healthy CTRL	100	71
		100	86				100	88
		100	102				100	106
	mean	100	89.3333			mean	100	88.3333
	SD		11.3725			SD		17.5024
		CD41					CD61
		Healthy CTRL	MYH9-RD				Healthy CTRL	MYH9-RD
	MFI - fold increase relative to Healthy CTRL	100	83			MFI - fold increase relative to Healthy CTRL	100	85
		100	89				100	95
		100	103				100	110
	mean	100	91.6667			mean	100	96.6667
	SD		10.2632			SD		12.5831

## Sheet: Figure 7C
		Healthy CTRL	MYH9-RD
	% proplatelet formation	2.9	2
		4.4	2.5
		5.8	2.7
		6	3
		7	2.9
		7.2	5.1
	mean	5.55	3.03333
	SD	1.63921	1.07269

## Sheet: Figure 7D
		n° of bifurcations
		Healthy CTRL	MYH9-RD
		1	1
		2	1
		2	1
		2	1
		2	1
		2	1
		2	1
		2	1
		2	1
		3	1
		3	1
		3	1
		3	1
		3	1
		4	1
		4	1
		4	1
		4	1
		4	1
		4	1
		4	1
		4	1
		4	1
		4	1
		4	1
		4	1
		5	1
		5	1
		5	1
		5	1
		5	1
		5	1
		5	1
		5	1
		5	1
		5	1
		5	1
		5	1
		6	1
		6	1
		6	1
		6	1
		6	1
		6	1
		6	1
		6	1
		6	1
		6	1
		6	1
		6	1
		6	1
		6	1
		6	1
		6	1
		6	1
		6	1
		6	1
		6	1
		6	1
		6	1
		6	1
		6	1
		6	1
		7	1
		7	1
		7	1
		7	1
		7	1
		7	1
		7	1
		7	2
		7	2
		7	2
		7	2
		7	2
		7	2
		7	2
		7	2
		8	2
		8	2
		9	2
		9	2
		9	2
		9	2
		9	2
		9	2
		9	2
		9	3
		10	3
		11	3
		11	3
		11	3
		11	3
		11	3
		12	3
		12	3
		12	4
		12	4
		12	5
		14	6
		14	6
	mean	6.29703	1.54455
	SD	2.81618	1.03465
