# Supplementary material for: Miniaturized 3D bone marrow tissue model to assess response to Thrombopoietin-receptor agonists in patients
Source: eLife. 2021 Jun 1;10:e58775. doi: 10.7554/eLife.58775 (PMC8169123; doi:10.7554/eLife.58775)
Supplement: Figure 8—source data 1. [file elife-58775-fig8-data1.xlsx]

## Sheet: Figure 8D
		CD41					CD42b
		Thrombopoietin	Thrombopoietin plus Eltrombopag				Thrombopoietin	Thrombopoietin plus Eltrombopag
	MFI	16	20			MFI	15	17
		17	18				18	20
		23	22				21	22
	mean	18.6667	20			mean	18	19.6667
	SD	3.78594	2			SD	3	2.51661

## Sheet: Figure 8E
		Thrombopoietin	Thrombopoietin plus Eltrombopag
	Output - Fold increase relative to thrombopoietin	1	1.5
		1	1.7
		1	2.1
	mean	1	1.76667
	SD		0.305505

## Sheet: Figure 8F
		Thrombopoietin	Thrombopoietin plus Eltrombopag
	Platelet count ex vivo relative to thrombopoietin	1	1.5
		1	1.5
		1	1.9
	mean	1	1.63333
	SD		0.23094
